# Supplementary material for: A bibliometric analysis of research trends and hotspots in alpine grassland degradation on the Qinghai-Tibet Plateau
Source: PeerJ. 2023 Oct 25;11:e16210. doi: 10.7717/peerj.16210 (PMC10612491; doi:10.7717/peerj.16210)
Supplement: Supplemental Information 1 — Year of publication (X-axis) and number of publications (Y-axis). Orange is the Chinese Science Citation Database, and blue is the Web of Science Core Collection. As shown in Figure 1. [file peerj-11-16210-s001.xlsx]

## Sheet: Sheet1
出版年	记录数
2019	113		1996	2002	2003	2004	2005	2006	2007	2008	2009	2010	2011	2012	2013	2014	2015	2016	2017	2018	2019	2020	2021	2022
2020	110	Web of Science Core Collection	2	0	4	3	5	5	7	9	13	14	24	21	38	48	52	58	70	79	104	126	122	161	965
2022	100	Chinese Science Citation Database	0	2	2	5	5	6	13	11	6	11	16	19	22	16	22	31	21	21	30	43	33	30	365
2021	97		2	2	6	8	10	11	20	20	19	25	40	40	60	64	74	89	91	100	134	169	155	191	1330
2018	94
2017	91
2016	83
2015	76
2012	73
2013	71
2014	69
2011	66
2010	59
2007	44
2006	39
2009	35
2008	33
2004	26
2005	22
2003	12
2002	10
